# Supplementary material for: Certificados profesionais e formación regrada: coexistencia ou competencia
Source: Royal Society of Chemistry journal article supplement (doi:10.1039/c8ob01944d), 2009-01-01
Supplement: c8ob01944d1.pdf [file c8ob01944d1.pdf]

Supplementary information

Dynamic Diels-Alder reactions of maleimide-furan amphiphiles and their  
fluorescence ON/OFF behaviours

Fen Li, Xiaohui Li, Xin Zhang\*

*School of Chemical Engineering and Technology, Tianjin University, Tianjin, 300072, China*

\*E-mail: xzhangchem@tju.edu.cn

Table of Contents

1. Materials and methods
2. Synthesis and characterization
3. Fluorescence spectroscopy
4. Single-crystal X-ray diffraction analysis
5. Aggregation behaviours
6. References

**1. Materials and Methods**

All chemicals were purchased and used without further purification. IR spectra were recorded on a Bruker ALPHA II FTIR spectrometer. High resolution mass spectra (HRMS) were recorded on a Bruker miorOTOF-QII with ESI. UV/Vis spectra were measured with Agilent Varian Cary 300 spectrometer. Fluorescence quantum yields ( $\Phi$ ) were calculated according to the equation as follows:

$$\phi = \phi_r \frac{I}{I_r} \frac{OD_r}{OD} \frac{n^2}{n_r^2}$$

where  $A$  and  $A_r$  are the sample and reference absorbance at the excitation wavelength, respectively,  $I$  is the area under the corrected emission spectrum, and  $n$  is the refractive index of the used solvents. The 9, 10-diphenylanthrene in cyclohexane ( $\phi_r = 0.90$ ) was used as a reference.<sup>1</sup> X-ray crystal data of **2** were collected at an Agilent Technologies SuperNova Single Crystal Diffractometer equipped with graphite monochromatic Mo  $K\alpha$  radiation ( $\lambda = 0.71073 \text{ \AA}$ ).

**NMR spectroscopy.**  $^1\text{H}$  NMR and  $^{13}\text{C}$  NMR spectra were recorded on a Bruker (400 MHz) spectrometer using  $\text{CDCl}_3$  as solvent and tetramethylsilane (TMS) as an internal standard.

**Fluorescence spectroscopy.** The time-resolved fluorescence lifetimes were measured with an Edinburgh Instruments FLS980 following excitation by a nanosecond flash lamp. The steady-state fluorescence spectra were recorded with the slit width of both monochromators of 0.7 nm.

**TEM characterization.** TEM measurements were performed on a HITACHI 7700 electron microscopy operating at an acceleration voltage of 80-120 kV. A drop of sample solution was first placed on 300-mesh copper grid coated with carbon, and was left to stand for 2 minutes. Then, the grid was tapped with filter paper to remove water for twice. Negative staining was performed by addition of a drop of uranyl acetate aqueous solution (1%) to the sample copper grid. After 2 minutes, the surface water on the grid was removed by tapping with filter paper.

## 2. Synthesis and characterization

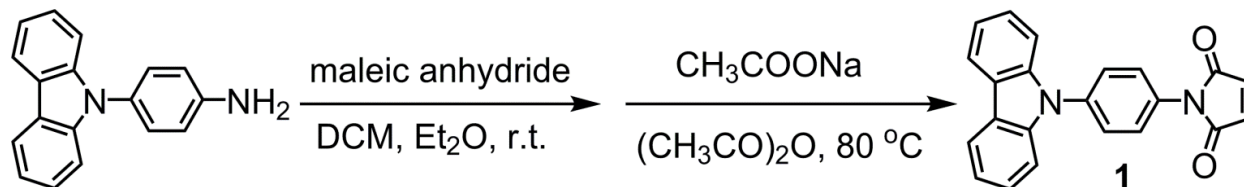

**N-Phenylcarbazole maleimide 1** was synthesized according to the literature.<sup>2</sup> 4 mL of the dichloromethane solution of 4-(9H-carbazol-9-yl)benzenamine (0.387 g, 1.5 mmol) was added dropwise to the diethyl ether (5 mL) solution of maleic anhydride (0.22 g, 2.25 mmol) with stirring at room temperature for 2 h. The precipitate was collected by filtration. The mixture of the obtained maleamic acid (0.5 g), sodium acetate (0.21 g) and acetic anhydride (2.2 mL) was heated with stirring at 80 °C for 10 h. The precipitate was collected by suction filtration, and washed by water and ethanol successively for three times. The crude product was recrystallized in dichloromethane. Finally, yellow crystals (2.4 g, 47.3%) were obtained.

**<sup>1</sup>H NMR** (400 MHz, CDCl<sub>3</sub>):  $\delta$  = 8.14 (d,  $J$  = 7.7 Hz, 2H), 7.65 (dd,  $J$  = 29.2, 8.7 Hz, 4H), 7.46 (d,  $J$  = 8.1 Hz, 2H), 7.44 – 7.26 (m, 4H), 6.91 (s, 2H).

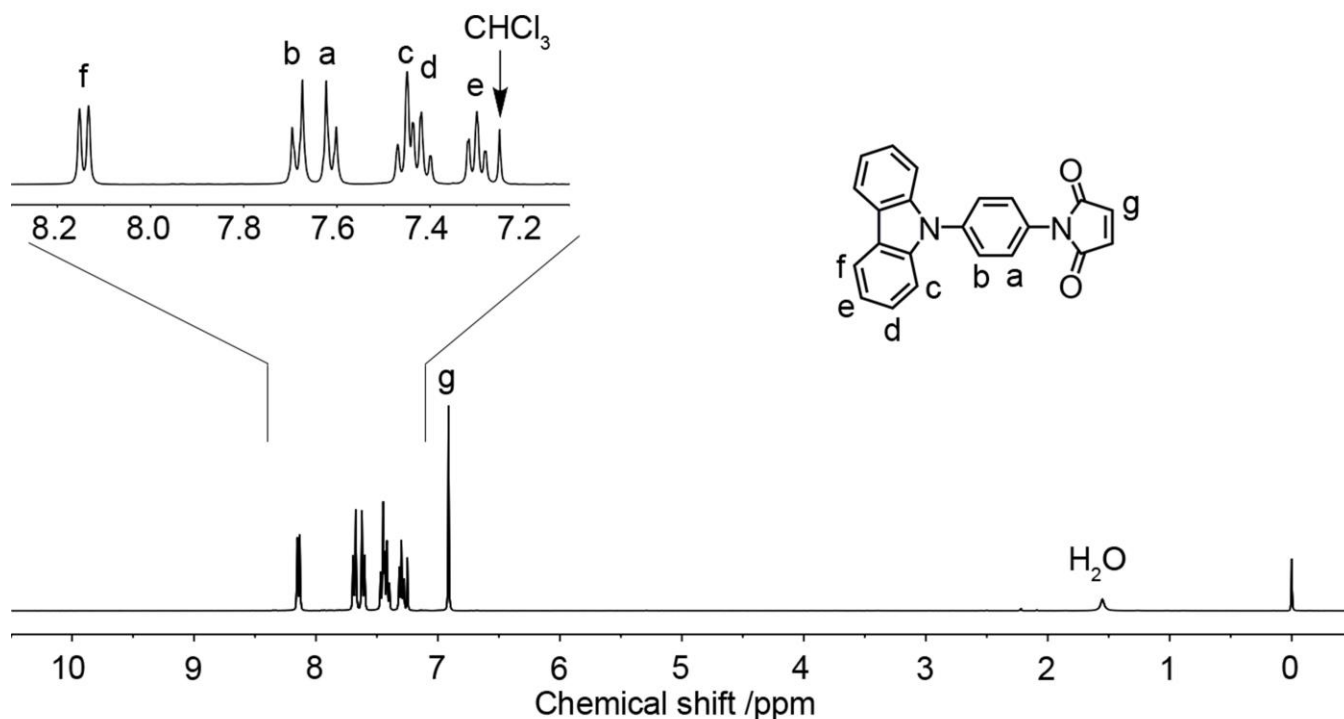

**Fig. S1.**  $^1\text{H}$  NMR spectrum of *N*-phenylcarbazole maleimide **1** in  $\text{CDCl}_3$  with corresponding assignments.

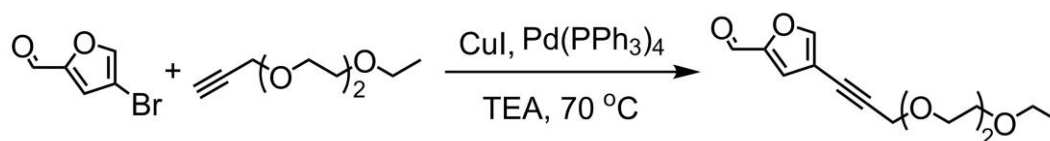

**4-(3-{2-[2-(Ethoxy) ethoxy] ethoxy}-1-propynyl)-2-furancarbaldehyde** was synthesized according to the literature with some modification.<sup>3</sup> 4-Bromo-2-furancarbaldehyde (0.35 g, 2 mmol) was dissolved in anhydrous triethylamine (10 mL) under  $\text{N}_2$ . Then, copper(I) iodide (0.0184g, 0.2 mmol) and tetrakis(triphenylphosphine)palladium (0) (0.2 g, 0.2 mmol) were added into the reaction solution. When the mixture was heated to 70 °C, 3-(2-(2-ethoxy) ethoxy) ethoxy)-1-propyne (0.41 g, 2.4 mmol) was added. After that, the mixture was further heated at 70 °C overnight with stirring. The solvent was evaporated under reduced pressure, and the mixture was extracted with petroleum ether (20 mL) for three times. The crude product was purified with silica gel column chromatography (ethyl acetate/petroleum ether = 1/4, v/v) to give a colorless oil (0.2 g, 33%).

**$^1\text{H}$  NMR** (400 MHz,  $\text{CDCl}_3$ ):  $\delta$  = 9.63 (s, 1H), 7.80 (s, 1H), 7.22 (d,  $J$  = 0.6 Hz, 1H), 4.39 (s, 2H), 3.76 – 3.49 (m, 10H), 1.20 (t,  $J$  = 7.0 Hz, 3H).

**$^{13}\text{C}$  NMR** (100 MHz,  $\text{CDCl}_3$ ):  $\delta$  = 177.66, 152.46, 150.28, 122.36, 110.10, 88.86, 75.31, 70.71, 70.42, 69.76, 69.39, 66.60, 58.98, 15.13.

**HRMS (ESI)**:  $m/z$  calcd for  $\text{C}_{14}\text{H}_{18}\text{O}_5$  [ $M + \text{Na}$ ] $^+$ : 289.1046; found: 289.1047.

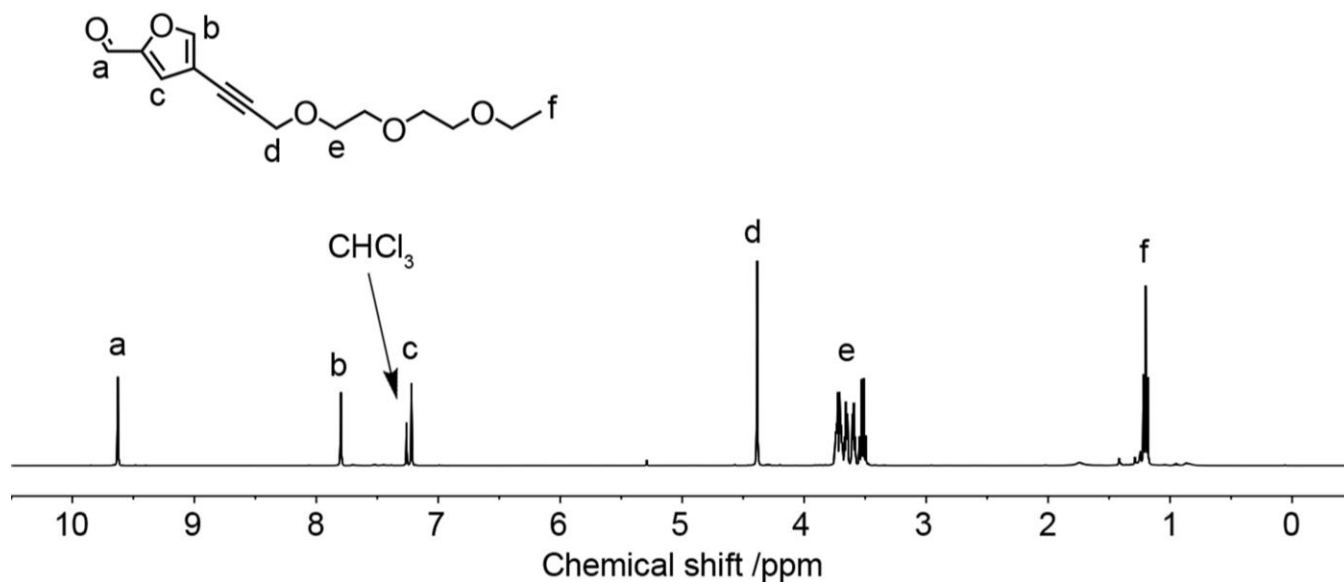

**Fig. S2.**  $^1\text{H}$  NMR spectrum of 4-(3-{2-[2-(ethoxy) ethoxy] ethoxy}-1-propynyl)-2-furancarbaldehyde in  $\text{CDCl}_3$  with corresponding assignments.

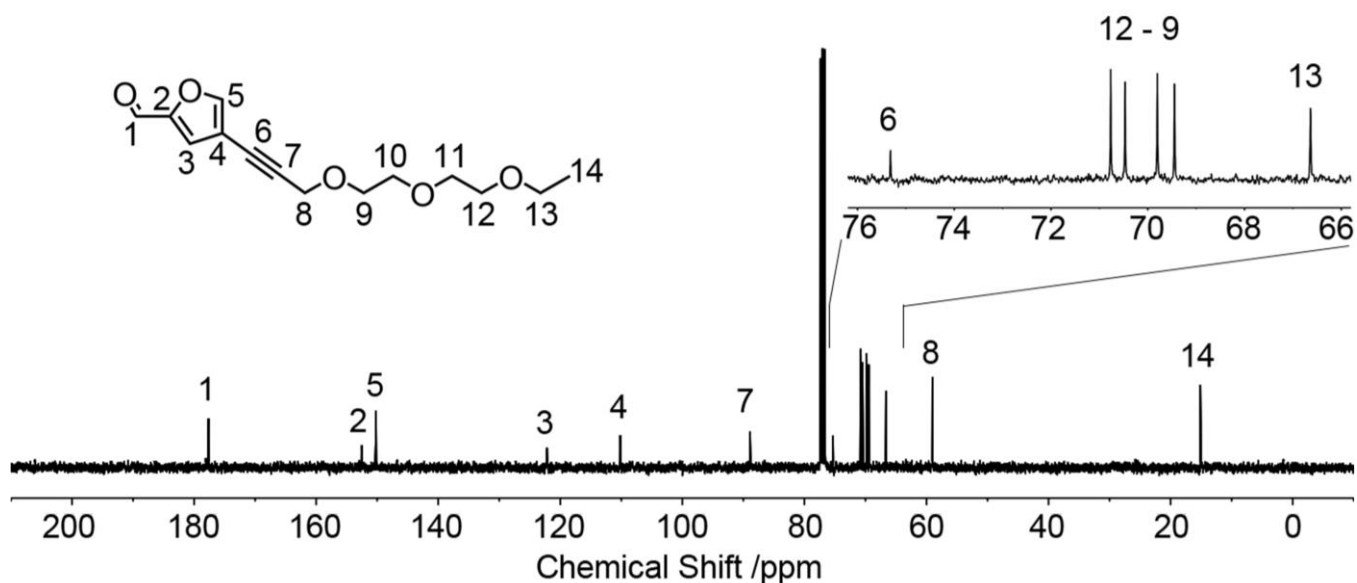

**Fig. S3.**  $^{13}\text{C}$  NMR spectrum of 4-(3-{2-[2-(ethoxy) ethoxy] ethoxy}-1-propynyl)-2-furancarbaldehyde in  $\text{CDCl}_3$  with corresponding assignments.

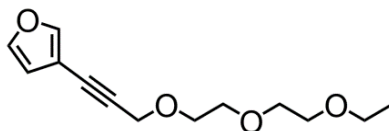

**3-(3-{2-[2-(ethoxy) ethoxy] ethoxy}-1-propynyl)-furan** was synthesized in the same manner as 4-(3-{2-[2-(ethoxy) ethoxy] ethoxy}-1-propynyl)-2-furancarbaldehyde, except for 4-bromo-2-furancarbaldehyde replaced by 3-bromofuran (0.29 g, 2 mmol). The crude product was purified with silica gel column chromatography (ethyl acetate/petroleum ether = 1/5, v/v) to give a colorless oil (0.19 g, 39%).

**<sup>1</sup>H NMR** (400 MHz, CDCl<sub>3</sub>):  $\delta$  = 7.61 (s, 1H), 7.39 – 7.34 (m, 1H), 6.44 (s, 1H), 4.39 (s, 2H), 3.83 – 3.46 (m, 12H), 1.21 (t, *J* = 8.9, 5.2 Hz, 3H).

**<sup>13</sup>C NMR** (100 MHz, CDCl<sub>3</sub>):  $\delta$  = 145.91, 142.77, 112.55, 107.01, 86.98, 77.53, 70.71, 70.47, 69.81, 69.17, 66.63, 59.16, 15.15.

**HRMS (ESI)**: *m/z* calcd for C<sub>13</sub>H<sub>18</sub>O<sub>4</sub> [*M* + Na]<sup>+</sup>: 238.1205, found: 261.1094.

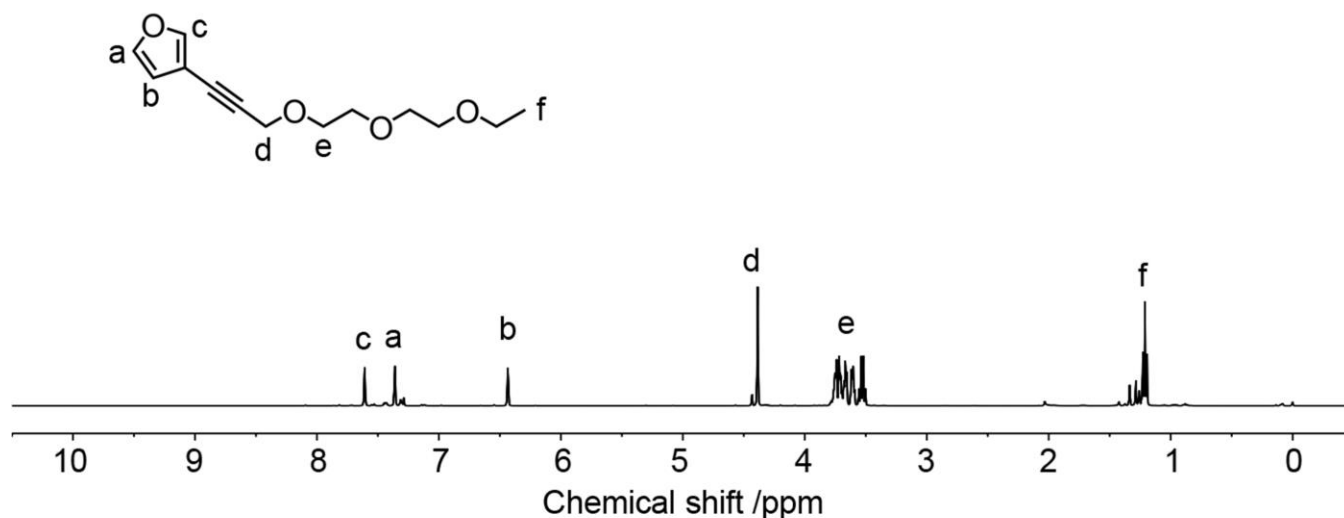

**Fig. S4.** <sup>1</sup>H NMR spectrum of 3-(3-{2-[2-(ethoxy) ethoxy] ethoxy}-1-propynyl)-furan in CDCl<sub>3</sub> with corresponding assignments.

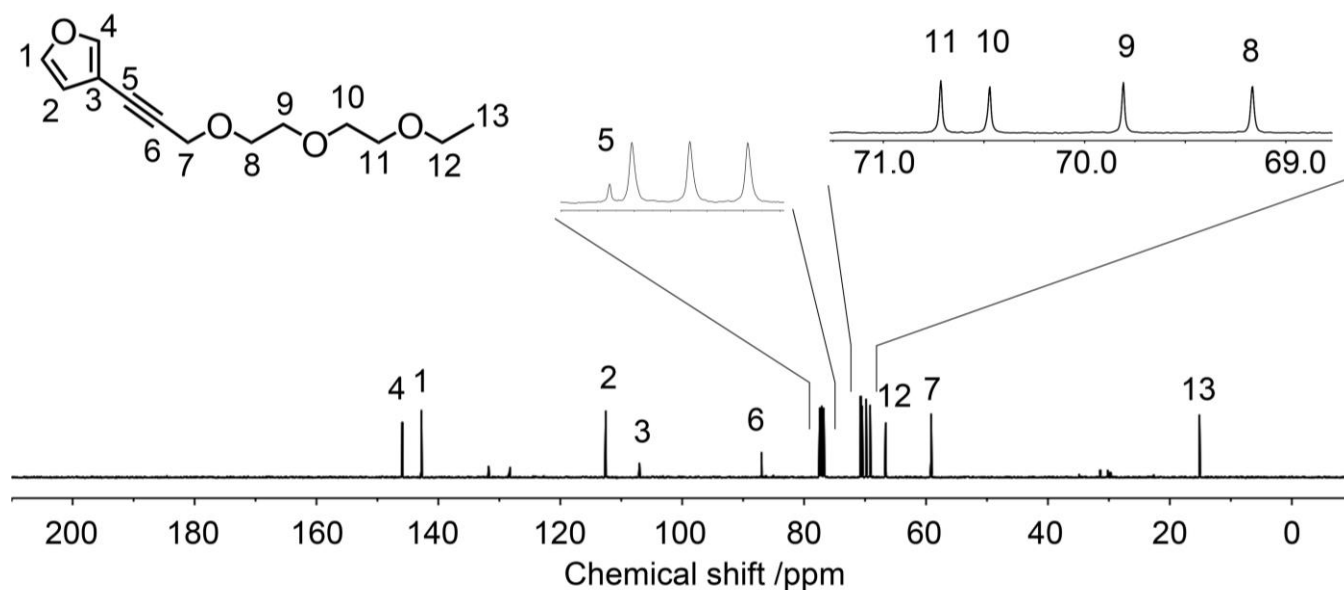

**Fig. S5.**  $^{13}\text{C}$  NMR spectrum of 3-(3-{2-[2-(ethoxy) ethoxy] ethoxy}-1-propynyl)-furan in  $\text{CDCl}_3$  with corresponding assignments.

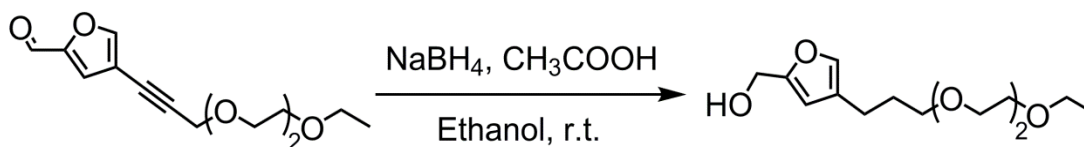

**[4-(3-{2-[2-(Ethoxy) ethoxy] ethoxy}-propyl)-furan-2-yl]-methanol** was synthesized according to the literature.<sup>4</sup> 4-(3-{2-[2-(Ethoxy) ethoxy] ethoxy}-1-propynyl)-2-furancarbaldehyde (0.6 g, 2 mmol) was dissolved in ethanol (20 mL) with stirring. The Pd/C (10%, wt) catalyst (200 mg) and acetic acid (1 mL) were added to the reaction solution.  $\text{NaBH}_4$  (0.64 g, 16 mmol) was slowly added to the reaction system at 0 °C. After stirred at room temperature for 24 h, the mixture was filtered. The filtrate was washed with water (100 mL), and then extracted with ethyl acetate (30 mL) for three times. The collected organic layer was concentrated and purified with column chromatography (silica gel, ethyl acetate/petroleum ether = 1/4, v/v) to give a colorless oil (0.34 g, 53%).

$^1\text{H}$  NMR (400 MHz,  $\text{CDCl}_3$ ):  $\delta$  = 7.18 (d,  $J$  = 1.0 Hz, 1H), 6.18 (s, 1H), 4.55 (d,  $J$  = 5.1 Hz, 2H), 3.69 – 3.46 (m, 12H), 2.46 (t,  $J$  = 7.4 Hz, 2H), 1.86 – 1.79 (m, 2H), 1.21 (t,  $J$  = 7.0 Hz, 3H).

$^{13}\text{C}$  NMR (100 MHz,  $\text{CDCl}_3$ ):  $\delta$  = 154.12, 138.89, 125.42, 109.27, 70.68, 70.64, 70.43, 70.18, 69.85, 66.66, 57.66, 29.82, 21.33, 15.15.

**HRMS (ESI):**  $m/z$  calcd for  $\text{C}_{14}\text{H}_{24}\text{O}_5$  [ $M + \text{Na}$ ] $^+$ : 295.1516, found: 295.1915.

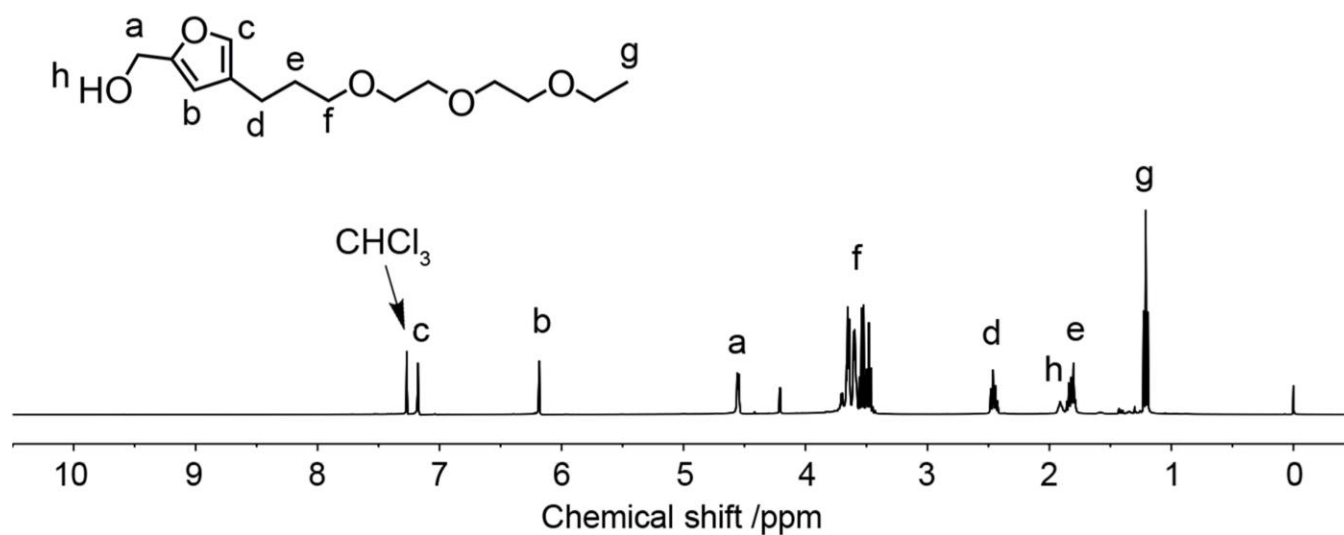

**Fig. S6.** <sup>1</sup>H NMR spectrum of [4-(3-{2-[2-(ethoxy) ethoxy] ethoxy}-propyl)-furan-2-yl]-methanol in CDCl<sub>3</sub> with corresponding assignments.

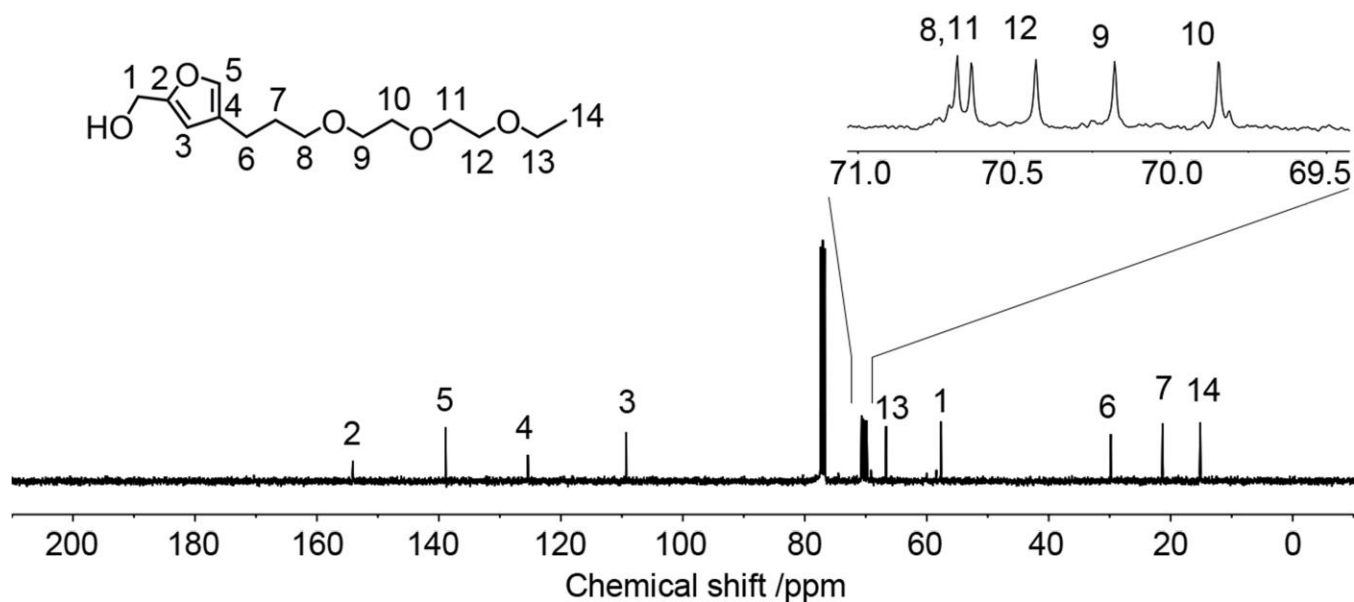

**Fig. S7.** <sup>13</sup>C NMR spectrum of [4-(3-{2-[2-(ethoxy) ethoxy] ethoxy}-propyl)-furan-2-yl]-methanol in CDCl<sub>3</sub> with corresponding assignments.

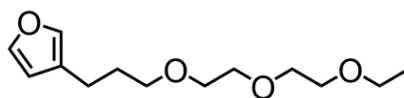

**3-(3-{2-[2-(ethoxy) ethoxy] ethoxy}-propyl)-furan** was synthesized in the same manner as [4-(3-{2-[2-(ethoxy) ethoxy] ethoxy}-propyl)-furan-2-yl]-methanol, except for [4-(3-{2-[2-(ethoxy) ethoxy] ethoxy}-propyl)-furan-2-yl]-methanol replaced by 3-(3-{2-[2-(ethoxy) ethoxy] ethoxy}-1-propynyl)-furan (0.55 g, 2 mmol). The crude product was purified with silica gel column chromatography (ethyl acetate/petroleum ether = 1/4, v/v) to give a colorless oil (0.45 g, 75%).

**<sup>1</sup>H NMR** (400 MHz, CDCl<sub>3</sub>):  $\delta$  = 7.34 (s, 1H), 7.22 (s, 1H), 6.27 (s, 1H), 3.68 – 3.46 (m, 12H), 2.49 (t,  $J$  = 7.6 Hz, 2H), 1.88 – 1.79 (m, 2H), 1.21 (t,  $J$  = 7.0 Hz, 3H).

**<sup>13</sup>C NMR** (100 MHz, CDCl<sub>3</sub>):  $\delta$  = 142.69, 138.91, 124.49, 111.01, 70.70, 70.62, 70.46, 70.17, 69.85, 66.64, 29.89, 21.25, 15.17.

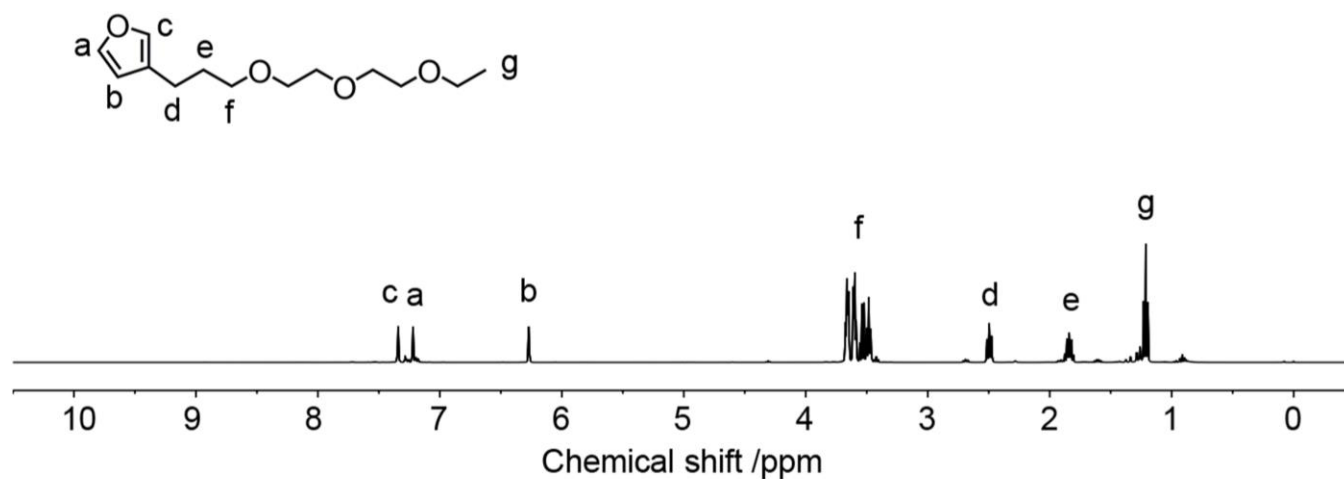

**Fig. S8.** <sup>1</sup>H NMR spectrum of 3-(3-{2-[2-(ethoxy) ethoxy] ethoxy}-propyl)-furan in CDCl<sub>3</sub> with corresponding assignments.



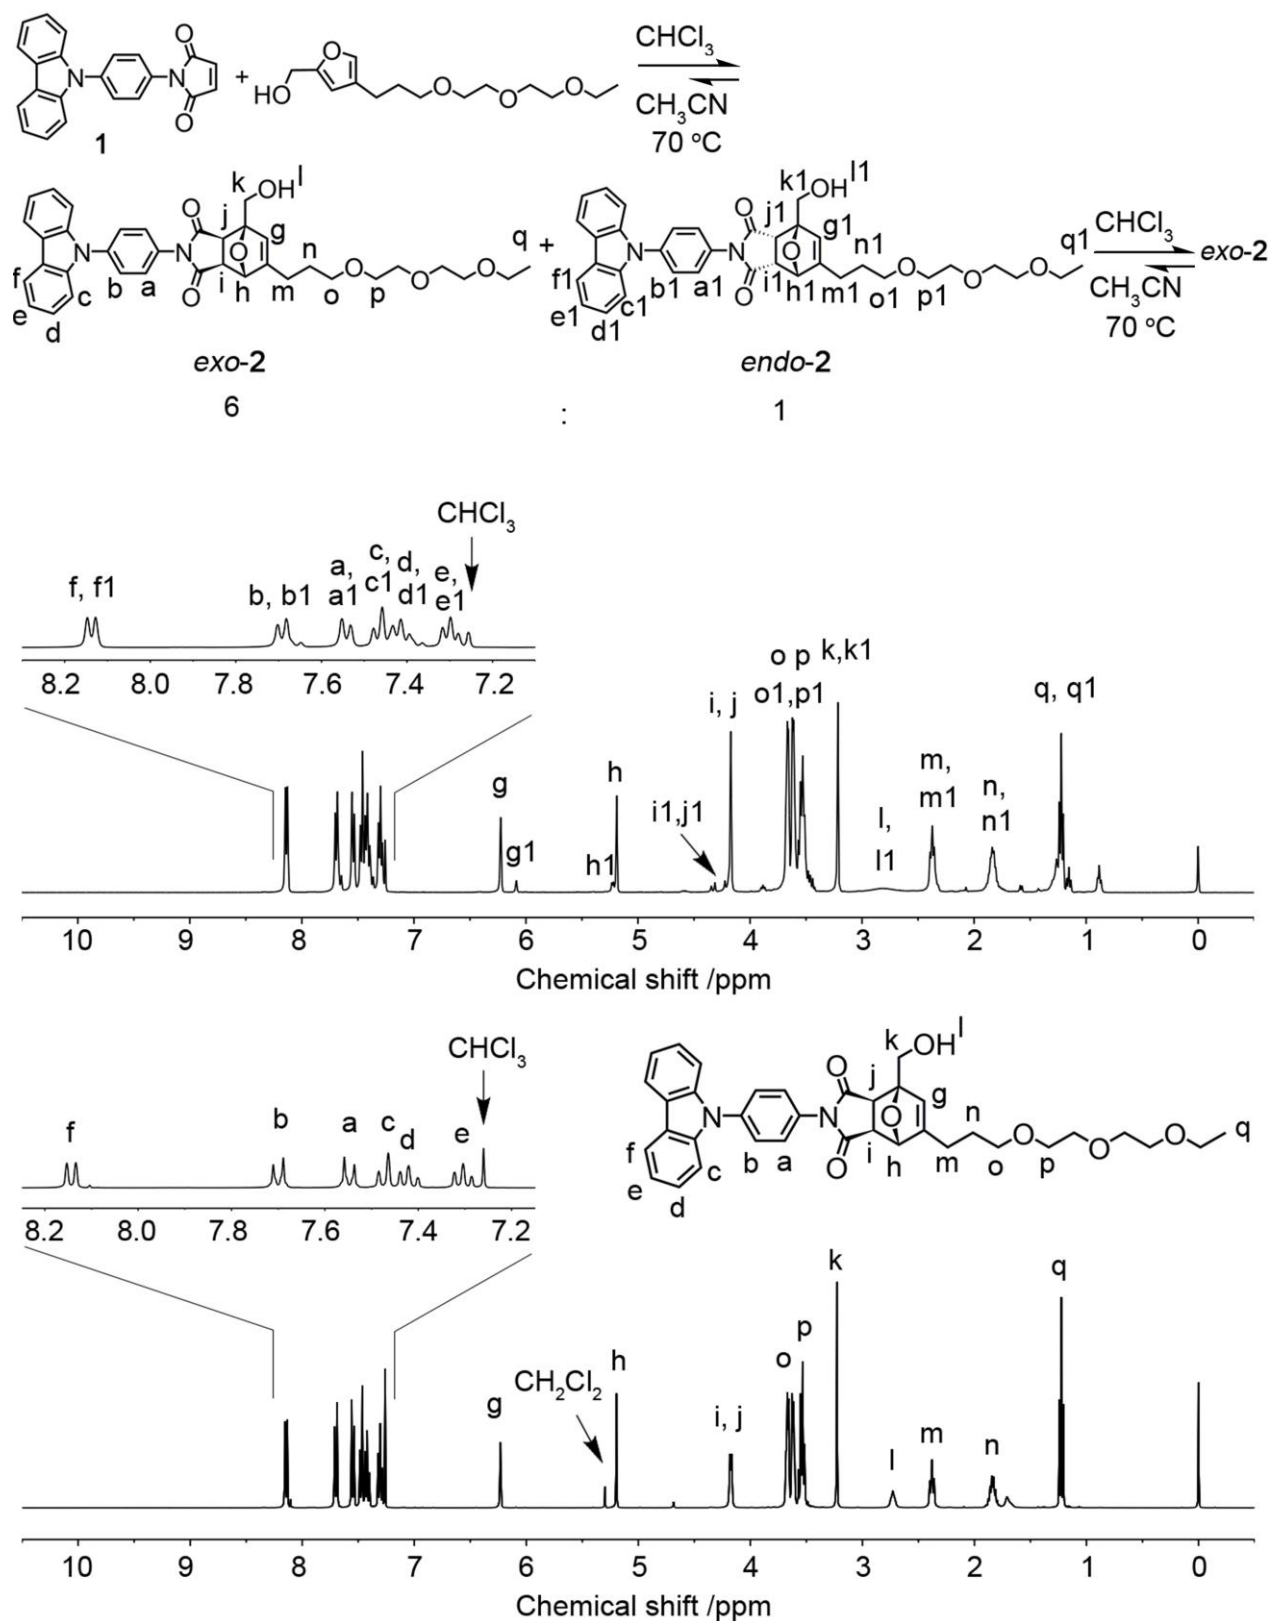

**Fig. S9.** <sup>1</sup>H NMR spectra of initially formed mixture of kinetically favored *endo-2* and thermodynamically stable *exo-2* (top) and finally pure *exo-2* (bottom) in CDCl<sub>3</sub> with corresponding assignments.

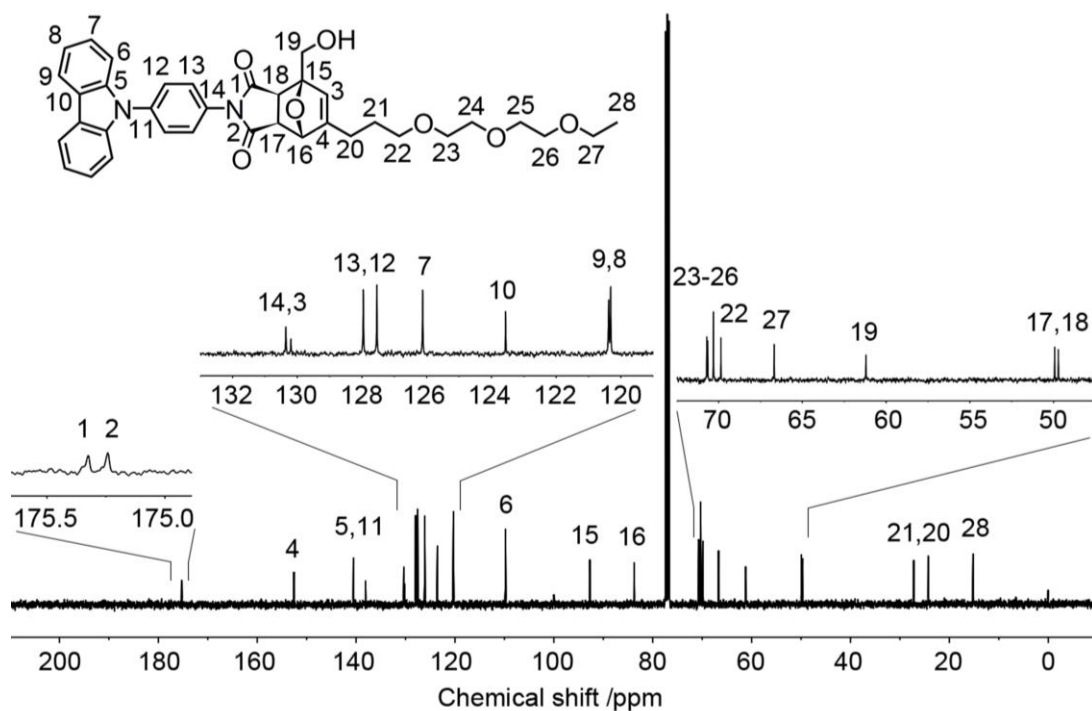

**Fig. S10.**  $^{13}\text{C}$  NMR spectrum of **2** in  $\text{CDCl}_3$  with corresponding assignments.

**Acquisition Parameter**

|             |            |                       |           |                  |           |
|-------------|------------|-----------------------|-----------|------------------|-----------|
| Source Type | ESI        | Ion Polarity          | Positive  | Set Nebulizer    | 0.8 Bar   |
| Focus       | Not active | Set Capillary         | 4500 V    | Set Dry Heater   | 180 °C    |
| Scan Begin  | 50 m/z     | Set End Plate Offset  | -500 V    | Set Dry Gas      | 6.0 l/min |
| Scan End    | 1600 m/z   | Set Collision Cell RF | 500.0 Vpp | Set Divert Valve | Waste     |

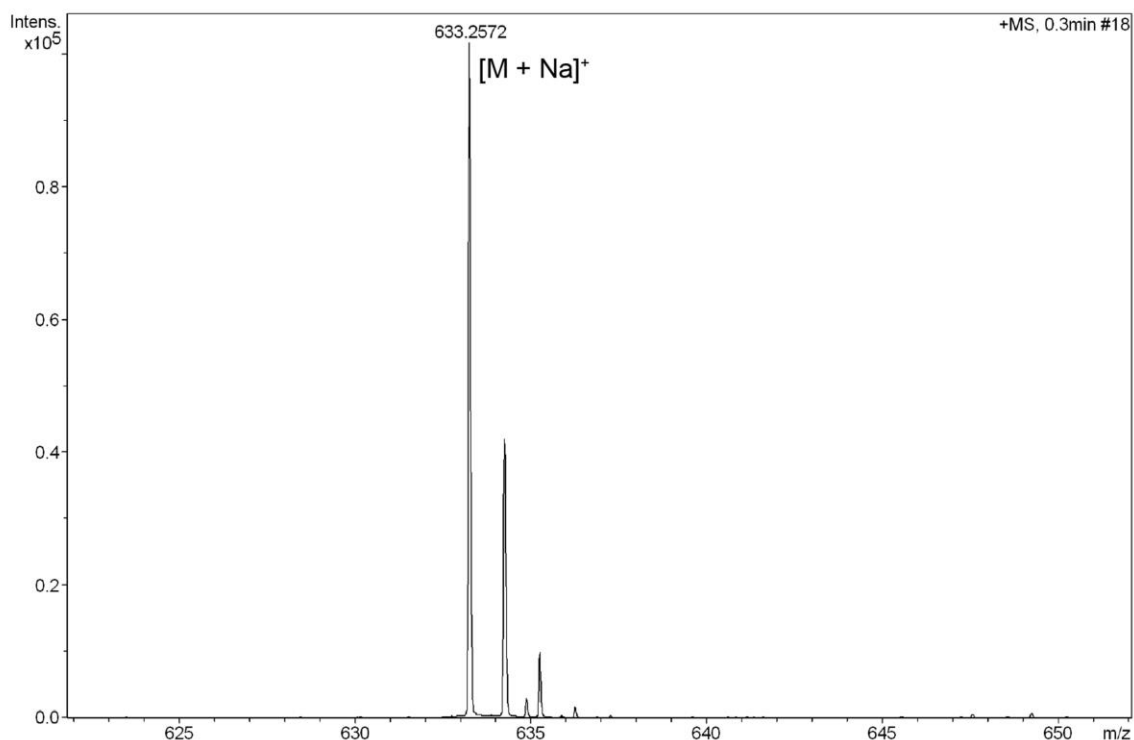

**Fig. S11.** High-resolution mass spectrum of **2**.

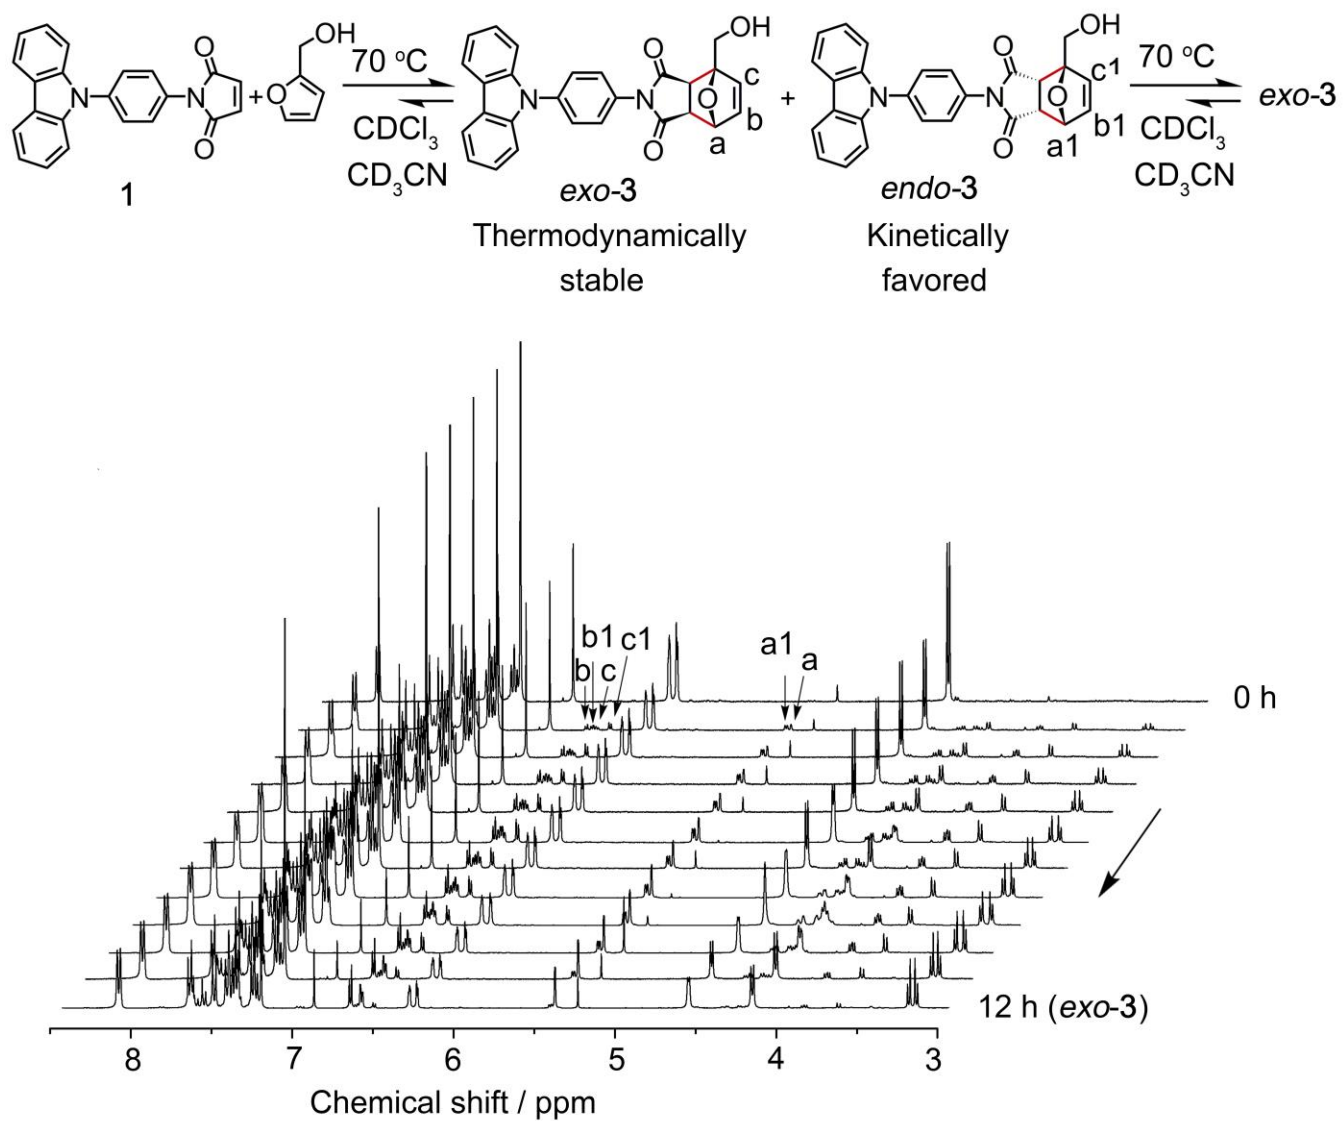

**Fig. S12.**  $^1\text{H}$  NMR spectra from initially formed mixture of *endo-3* and *exo-3*, to finally *exo-3* in  $\text{CDCl}_3$ .



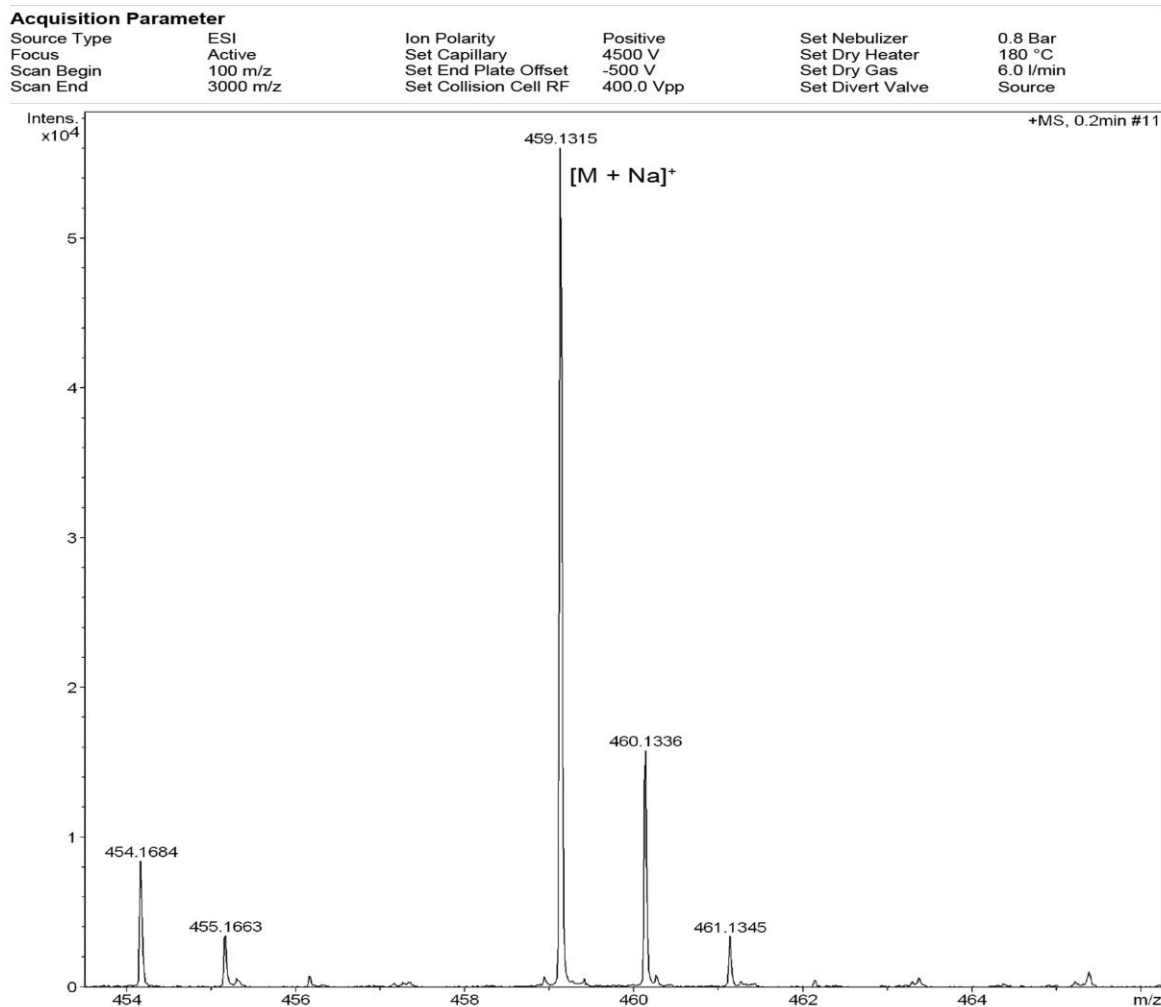

**Fig. S15.** High-resolution mass spectrum of **3**.

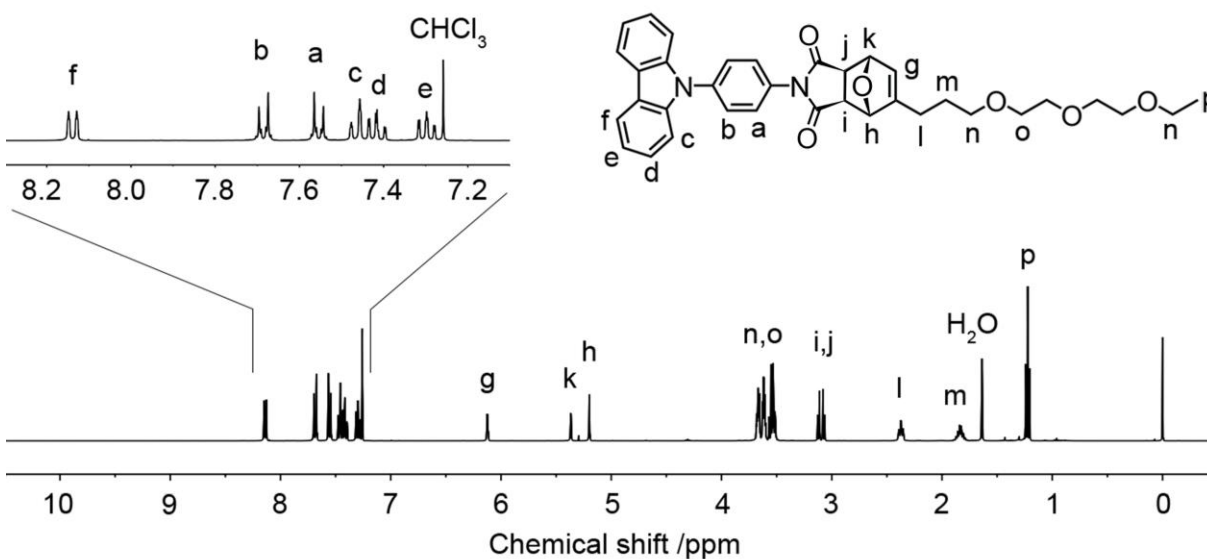

**Fig. S16.**  $^1\text{H}$  NMR spectrum of **4** in  $\text{CDCl}_3$  with corresponding assignments.

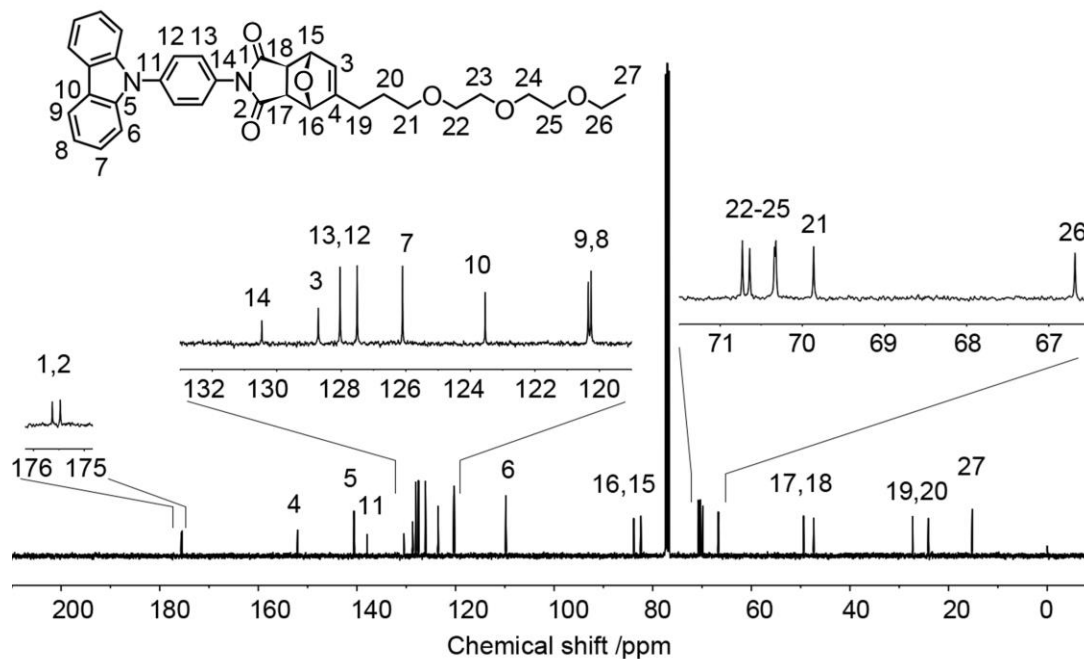

**Fig. S17.**  $^{13}\text{C}$  NMR spectrum of **4** in  $\text{CDCl}_3$  with corresponding assignments.

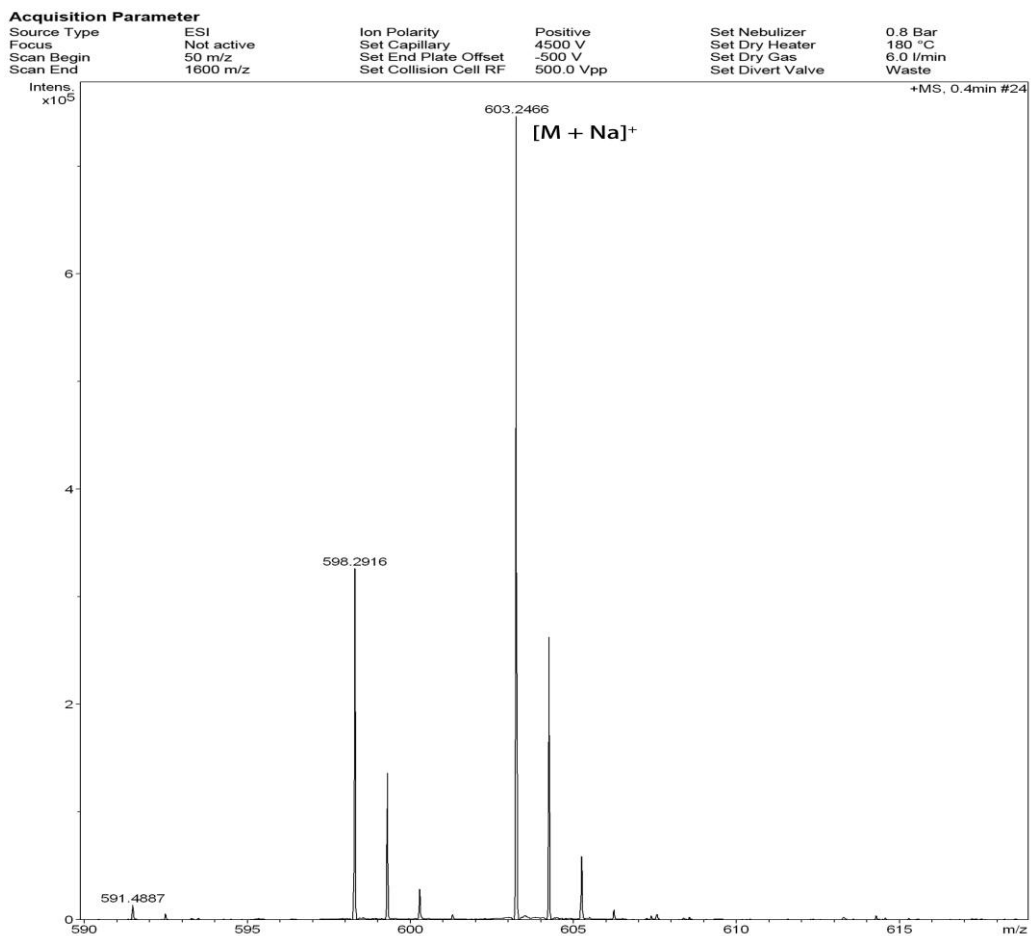

**Fig. S18.** High-resolution mass spectrum of **4**

### 3. Fluorescence spectroscopy

#### Steady-state fluorescence spectroscopy

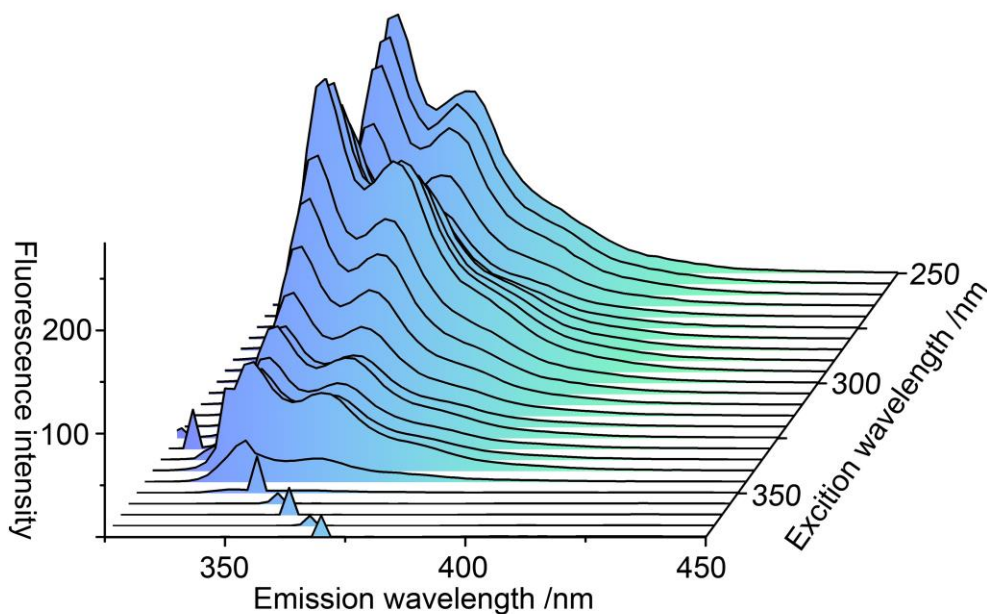

**Fig. S19.** Three-dimensional fluorescence spectra of **4** in dichloromethane.  $[\mathbf{4}] = 2 \times 10^{-5}$  M.

#### Time-resolved fluorescence spectroscopy

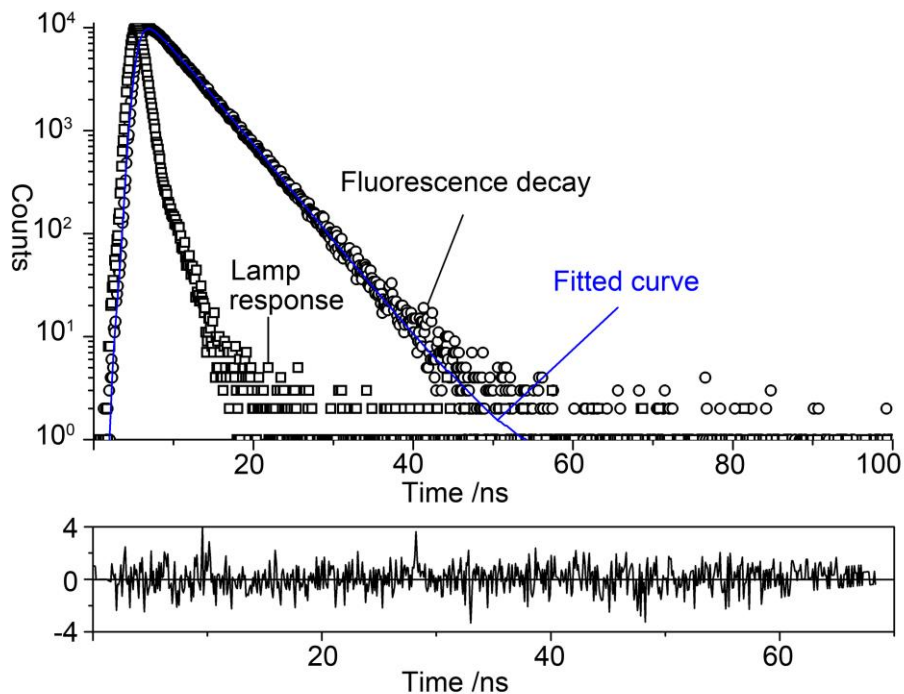

**Fig. S20.** Fluorescence decay of **4** in dichloromethane,  $\langle \tau \rangle = 4.6$  ns  $\chi^2 = 0.993$ .  $\lambda_{\text{ex}} = 295$  nm,  $\lambda_{\text{em}} = 345$  nm.  $[\mathbf{4}] = 2 \times 10^{-5}$  M.

#### 4. Single-crystal X-ray diffraction analysis

**Table S1.** Crystal data and structure refinement for **3**.

|                                     |                                                                                                             |                                                                                    |
|-------------------------------------|-------------------------------------------------------------------------------------------------------------|------------------------------------------------------------------------------------|
| Identification code                 | P150428F                                                                                                    | 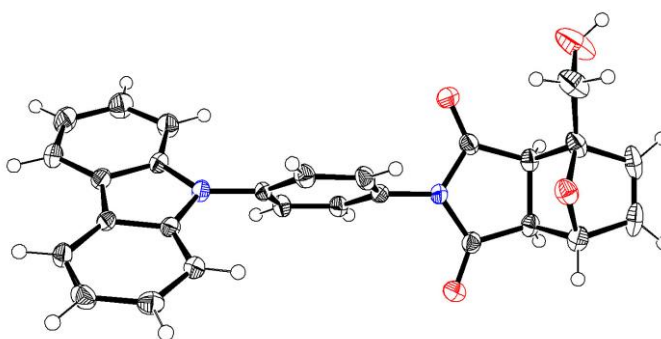 |
| Empirical formula                   | C <sub>27</sub> H <sub>20</sub> N <sub>2</sub> O <sub>4</sub>                                               |                                                                                    |
| Formula weight                      | 436.45                                                                                                      |                                                                                    |
| Temperature                         | 162 (30) K                                                                                                  |                                                                                    |
| Wavelength                          | 0.71073 Å                                                                                                   |                                                                                    |
| Crystal system                      | Monoclinic                                                                                                  |                                                                                    |
| space group                         | P2 <sub>1</sub> /c                                                                                          |                                                                                    |
| Unit cell dimensions                | a= 13.3657 (5) Å    α = 90.00 °<br>b= 10.0390 (3) Å    β = 97.407 (3) °<br>c = 15.8436 (5) Å    γ = 90.00 ° |                                                                                    |
| Volume                              | 2108.12 (12) Å <sup>3</sup>                                                                                 |                                                                                    |
| Z                                   | 4                                                                                                           |                                                                                    |
| Calculated density                  | 1.375 Mg/m <sup>3</sup>                                                                                     |                                                                                    |
| Absorption coefficient              | 0.093 mm <sup>-1</sup>                                                                                      |                                                                                    |
| F (000)                             | 912                                                                                                         |                                                                                    |
| Crystal size                        | 0.4 x 0.3 x 0.1 mm <sup>3</sup>                                                                             |                                                                                    |
| Theta range for data collection     | 4.0240 to 28.3880°                                                                                          |                                                                                    |
| Limiting indices                    | -15<=h<=13, -11<=k<=11, -17<=l<=18                                                                          |                                                                                    |
| Reflections collected / unique      | 7907/3701 [R (int) = 0.0308]                                                                                |                                                                                    |
| Completeness to<br>theta = 26.3154° | 99.76%                                                                                                      |                                                                                    |
| Max. and min. transmission          | 1.00000 and 0.46433                                                                                         |                                                                                    |
| Refinement method                   | Full matrix least square F <sup>2</sup>                                                                     |                                                                                    |
| Data / restraints / parameters      | 3701 / 0 / 299                                                                                              |                                                                                    |
| Goodness-of-fit on F <sup>2</sup>   | 1.043                                                                                                       |                                                                                    |
| Final R indices [I > 2sigma (I) ]   | R1 = 0.0497, wR2 = 0.1138                                                                                   |                                                                                    |
| R indices ( all data )              | R1 = 0.0672, wR2 = 0.1256                                                                                   |                                                                                    |
| Largest diff. peak and hole         | 0.28 and -0.25 e.Å <sup>-3</sup>                                                                            |                                                                                    |



## 5. Aggregation behaviours

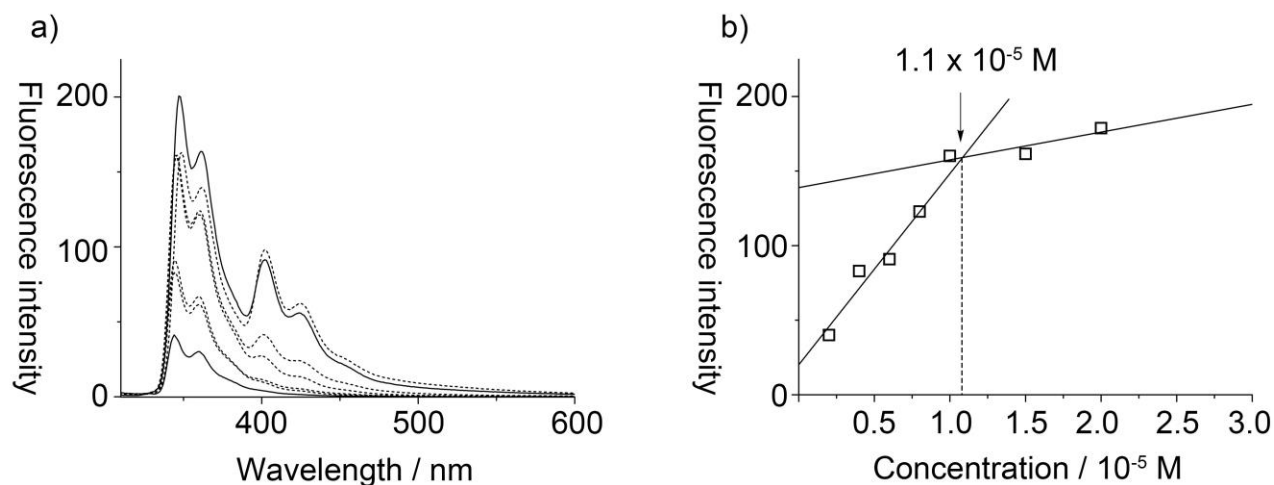

**Fig. S21.** a) Fluorescence spectra of **2** in deionized water-containing THF (95% water, v/v) with increasing concentration. b) The changes in fluorescence intensity at 345 nm with increasing the concentration of **2**. Arrow indicates the critical turning point at  $1.1 \times 10^{-5}$  M, which reveals a critical aggregation concentration.

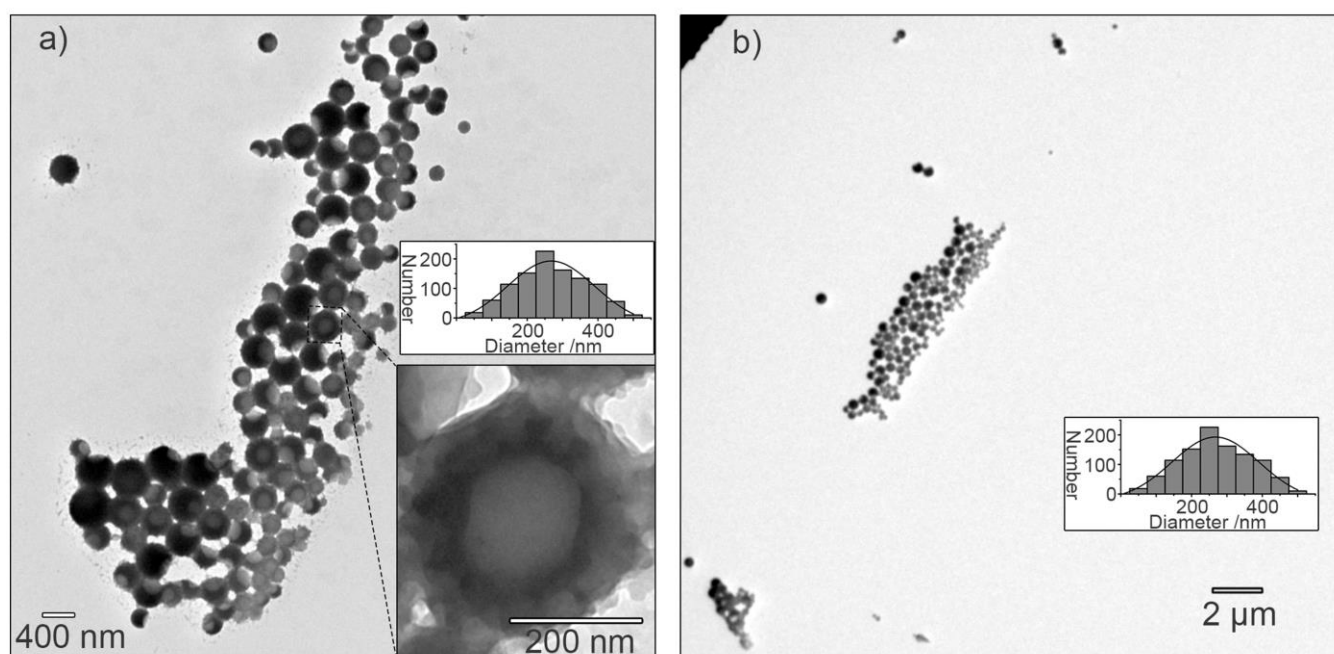

**Fig. S22.** a) and b) TEM images of vesicular aggregates of **2** prepared from the aqueous solution.  $[2] = 2 \times 10^{-4}$  M. Inset: size distribution of vesicular aggregates of **2**.

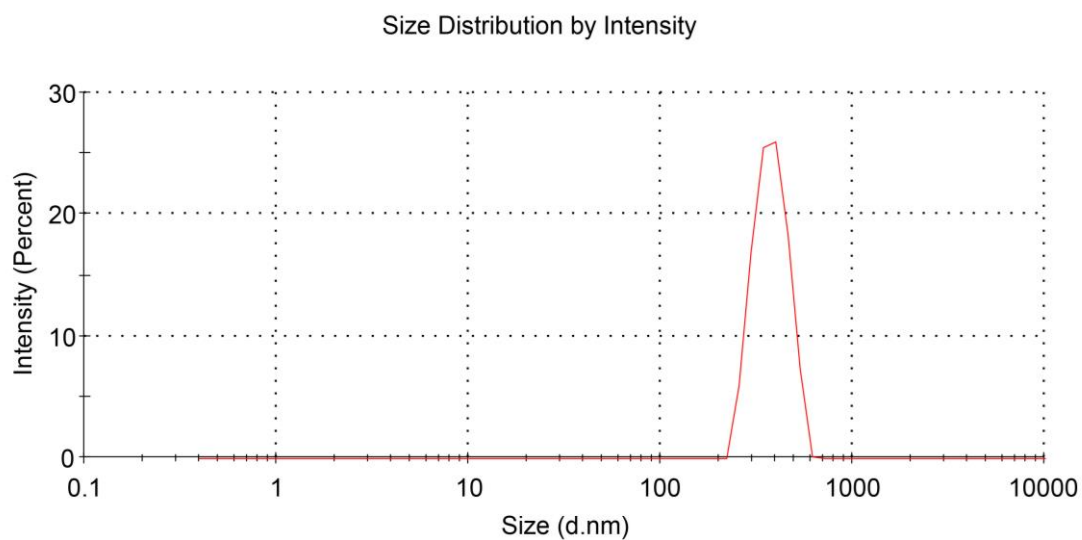

**Fig. S23.** Size distribution of the aggregates of **2** in water obtained from Dynamic light scattering measurements.  $[2] = 2 \times 10^{-4}$  M.

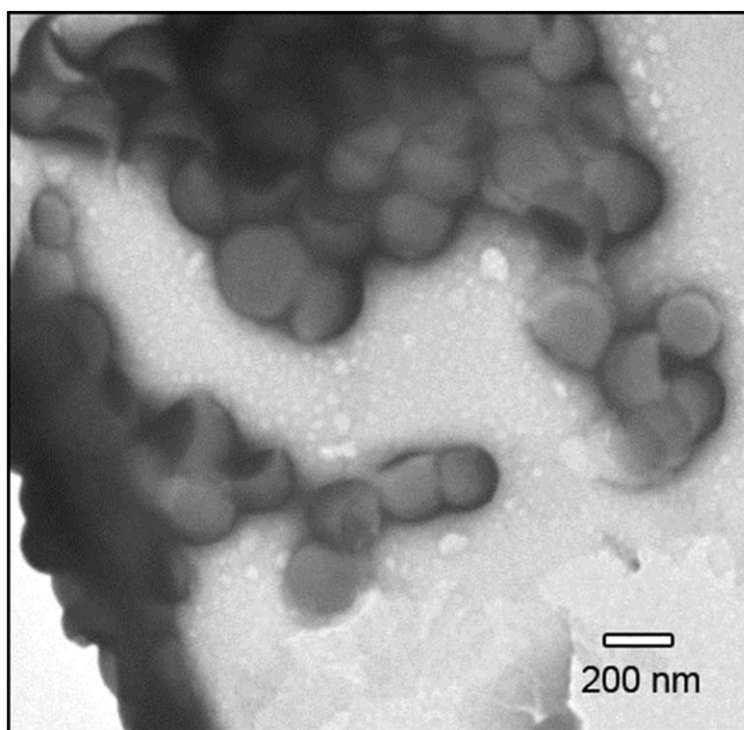

**Fig. S24.** TEM image of the reformed vesicular aggregates of **2** after thermal treatment of 90 °C for 2 hr, then cooling to room temperature.  $[2] = 2 \times 10^{-4}$  M.

## 6. References

1. a) D. F. Eaton *Pure and Appl. Chem.* 1988, **60**, 1107-1114; b) L. Yang, G. Fan, X. Ren, L. Zhao, J. Wang and Z. Chen *Phys. Chem. Chem. Phys.* 2015, **17**, 9167-9172.
2. B. Wang, X. Zhang, X. Jia, Z. Li, Y. Ji, L. Yang and Y. Wei *J. Am. Chem. Soc.* 2004, **126**, 15180-15194.
3. a) X. Zhang, Z. Chen and F. Würthner *J. Am. Chem. Soc.* 2007, **129**, 4886-4887; b) L. Marin, V. Gandon, E. Schulz and D. Leboeuf *Adv. Synth. Catal.* 2017, **359**, 1157-1163.
4. A. T. Tran, V. A. Huynh, E. M. Friz, S. K. Whitney and D. B. Cordes *Tetrahedron Lett.* 2009, **50**, 1817-1819.
